# Supplementary material for: The Interplay of GPER1 with 17β-Aminoestrogens in the Regulation of the Proliferation of Cervical and Breast Cancer Cells: A Pharmacological Approach
Source: MDPI journal article supplement (doi:10.3390/ijerph191912361), 2022-09-28
Supplement: s1 [file s1]

# Supplementary Material

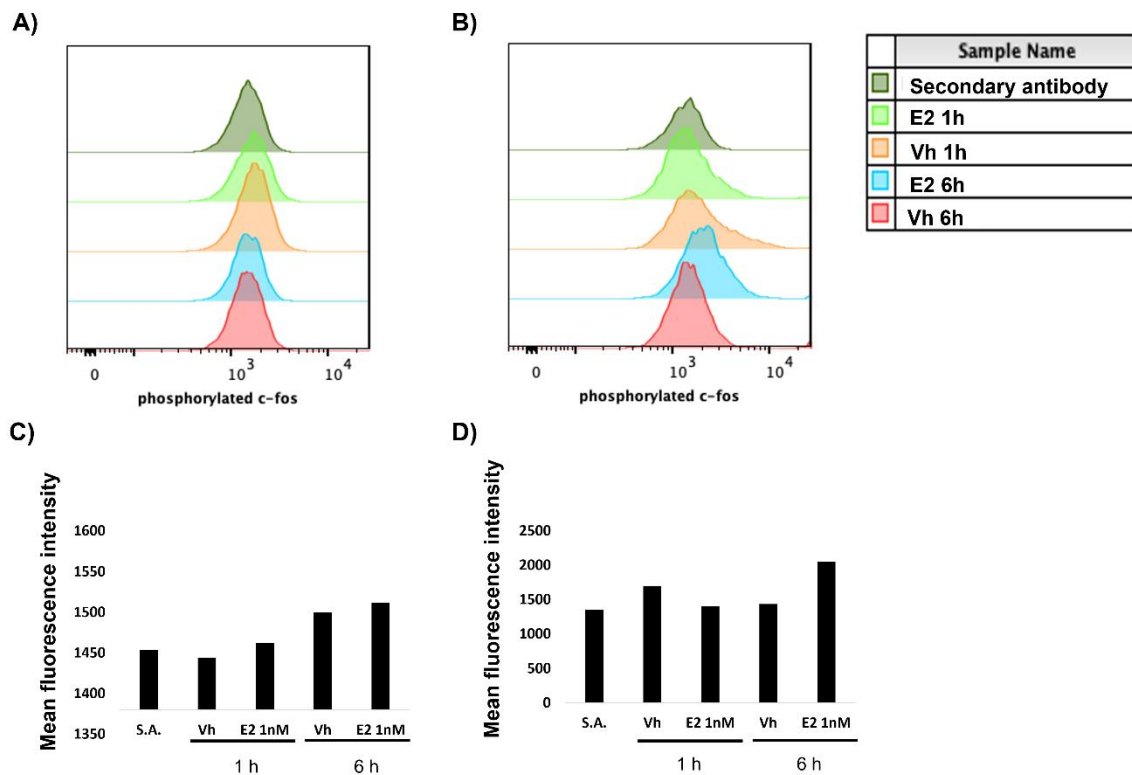

**Figure S1.** Analysis of the phosphorylation of c-fos at 1 and 6 h in MCF-7 and SIHA cells after the exposure to E2  $1 \times 10^{-9}$  M (1nM). Histograms of A) MCF-7 and B) SIHA cell lines. MFI values for each treatment are shown. Median fluorescence intensity (MFI) of c-fos in C) MCF-7 and D) SIHA cells are displayed.
